# Supplementary material for: Determination of the Prevalence of Microsatellite Instability, BRAF and KRAS/NRAS Mutation Status in Patients with Colorectal Cancer in Slovakia
Source: MDPI journal article supplement (doi:10.3390/cancers16061128), 2024-03-12
Supplement: s1 [file s1]

**Supplementary Table S1: List of all patients enrolled in the study with their respective parameters:**

Patient number in the study, code of diagnosis (according to ICD-10), age, gender, neoplastic cells percentage (NCP) in a tissue sample, mutation status of *RAS*, *BRAF*, and MSI status.

| Patient | ICD-10<br>code | Age | Sex | NCP<br>(%) | KRAS/NRAS                  | BRAF    | MSI   |
|---------|----------------|-----|-----|------------|----------------------------|---------|-------|
| 1       | C20            | 86  | M   | 20         | KRAS: c.38G>T, p.G13V      | N       | MSS   |
| 2       | C20            | 79  | F   | 70         | KRAS: c.436G>C, p.A146P    | N       | MSS   |
| 3       | C18.7          | 62  | F   | 80         | KRAS: c.38G>A, p.G13D      | N       | MSS   |
| 4       | C20            | 71  | M   | 70         | N                          | N       | MSS   |
| 5       | C19            | 56  | F   | 60         | N                          | N       | MSS   |
| 6       | C18.2          | 62  | F   | 100        | KRAS: c.38G>A, p.G13D      | N       | MSI-H |
| 7       | C20            | 78  | M   | 20         | NRAS: c.183A>T, p.Q61H     | N       | MSS   |
| 8       | C18.7          | 65  | F   | 30         | N                          | N       | MSS   |
| 9       | C18.5          | 45  | F   | 40         | N                          | N       | MSS   |
| 10      | C18.0          | 44  | M   | 20         | KRAS: c.34G>A, p.G12S      | N       | MSS   |
| 11      | C18.9          | 65  | M   | 80         | N                          | N       | MSS   |
| 12      | C20            | 55  | M   | 10         | N                          | N       | MSS   |
| 13      | C18.5          | 70  | M   | 20         | N                          | N       | MSS   |
| 14      | C19            | 61  | M   | 60         | N                          | p.V600E | MSS   |
| 15      | C19            | 51  | M   | 80         | N                          | N       | MSS   |
| 16      | C20            | 42  | F   | 70         | N                          | N       | MSS   |
| 17      | C19            | 56  | F   | 10         | N                          | N       | MSS   |
| 18      | C20            | 27  | M   | 70         | N                          | N       | MSS   |
| 19      | C20            | 72  | F   | 40         | N                          | N       | MSS   |
| 20      | C18.9          | 69  | F   | 70         | N                          | N       | MSS   |
| 21      | C19            | 66  | M   | 90         | N                          | N       | MSS   |
| 22      | C20            | 77  | F   | 20         | N                          | N       | MSS   |
| 23      | C20            | 73  | M   | 60         | N                          | N       | MSS   |
| 24      | C21.0          | 68  | F   | 70         | c.183A>C, p.Q61H           | N       | MSS   |
| 25      | C20            | 70  | M   | 60         | N                          | N       | MSS   |
| 26      | C20            | 58  | F   | 80         | KRAS: c.35G>T, p.G12V      | N       | MSS   |
| 27      | C19            | 70  | M   | 70         | N                          | p.V600E | MSS   |
| 28      | C20            | 75  | M   | 20         | N                          | N       | MSS   |
| 29      | C26.0          | 65  | M   | 70         | N                          | N       | MSS   |
| 30      | C20            | 47  | F   | 90         | KRAS: c.35G>T, p.G12V      | N       | MSS   |
| 31      | C18            | 74  | M   | 80         | N                          | p.V600E | MSI-H |
| 32      | C19            | 57  | M   | 90         | KRAS: c.35G>T, p.G12V      | N       | MSS   |
| 33      | C18.7          | 51  | M   | 70         | N                          | N       | MSS   |
| 34      | C19            | 57  | M   | 70         | N                          | N       | MSS   |
| 35      | C18.2          | 79  | F   | 70         | KRAS: c.35G>A, p.G12D      | p.V600E | MSI-H |
| 36      | C18.7          | 65  | M   | 70         | KRAS: c.35G>T, p.G12V      | N       | MSS   |
| 37      | C18.2          | 67  | M   | 90         | KRAS: c.35G>A, p.Gly12Asp  | N       | MSI-H |
| 38      | C18.7          | 70  | F   | 70         | NRAS: c.183A>T, p.Gln61His | N       | MSS   |
| 39      | C18.7          | 44  | M   | 30         | N                          | N       | MSS   |
| 40      | C20            | 64  | M   | 40         | KRAS: c.35G>A, p.Gly12Asp  | N       | MSS   |
| 41      | C21.0          | 70  | M   | 20         | N                          | N       | MSS   |

|    |       |    |   |    |                           |         |     |
|----|-------|----|---|----|---------------------------|---------|-----|
| 42 | C20   | 80 | F | 60 | N                         | N       | MSS |
| 43 | C19   | 67 | F | 70 | KRAS: c.35G>T, p.Gly12Val | N       | MSS |
| 44 | C20   | 67 | M | 20 | N                         | N       | MSS |
| 45 | C18   | 61 | M | 70 | KRAS: c.35G>T, p.Gly12Val | N       | MSS |
| 46 | C20   | 66 | M | 20 | KRAS: c.34G>T, p.Gly12Cys | N       | MSS |
| 47 | C20   | 26 | M | 20 | N                         | N       | MSS |
| 48 | C18.0 | 65 | F | 40 | KRAS: c.35G>A, p.Gly12Asp | N       | MSS |
| 49 | C19   | 59 | M | 70 | N                         | N       | MSS |
| 50 | C18.7 | 67 | F | 30 | N                         | N       | MSS |
| 51 | C18.7 | 62 | F | 50 | N                         | N       | MSS |
| 52 | C20   | 62 | F | 30 | NRAS: c.35G>C, p.Gly12Ala | N       | MSS |
| 53 | C18.8 | 70 | F | 50 | N                         | N       | MSS |
| 54 | C18.0 | 70 | F | 5  | KRAS: c.35G>T, p.Gly12Val | N       | MSS |
| 55 | C21.0 | 73 | M | 30 | KRAS: c.35G>T, p.Gly12Val | N       | MSS |
| 56 | C18.0 | 60 | F | 70 | KRAS: c.38G>A, p.Gly13Asp | N       | MSS |
| 57 | C18.9 | 74 | M | 70 | N                         | N       | MSS |
| 58 | C18.2 | 77 | F | 60 | N                         | p.V600E | MSS |
| 59 | C18.7 | 64 | M | 20 | N                         | N       | MSS |
| 60 | C20   | 64 | M | 20 | N                         | N       | MSS |
| 61 | C18.9 | 57 | M | 5  | N                         | N       | MSS |
| 62 | C20   | 72 | F | 15 | KRAS: c.35G>A, p.G12D     | N       | MSS |
| 63 | C20   | 66 | F | 10 | N                         | N       | MSS |
| 64 | C20   | 43 | M | 70 | NRAS: c.35G>A, p.G12D     | N       | MSS |
| 65 | C18   | 39 | F | 8  | KRAS: c.35G>A, p.G12D     | N       | MSS |
| 66 | C20   | 61 | F | 70 | NRAS: c.182A>G, p.Q61R    | N       | MSS |
| 67 | C18.5 | 49 | F | 70 | KRAS: c.182A>T, p.Q61L    | N       | MSS |
| 68 | C18.0 | 69 | M | 20 | KRAS: c.35G>A, p.G12D     | N       | MSS |
| 69 | C18.7 | 77 | M | 10 | N                         | N       | MSS |
| 70 | C20   | 68 | M | 70 | N                         | N       | MSS |
| 71 | C19   | 64 | M | 10 | N                         | N       | MSS |
| 72 | C18.0 | 67 | F | 90 | KRAS: c.38G>A, p.G13D     | N       | MSS |
| 73 | C18.7 | 51 | M | 90 | KRAS: c.38G>A, p.G13D     | N       | MSS |
| 74 | C21.0 | 54 | F | 90 | KRAS: c.34G>A, p.G12S     | N       | MSS |
| 75 | C20   | 78 | M | 20 | KRAS: c.437C>T, p.A146V   | N       | MSS |
| 76 | C18.7 | 75 | F | 15 | NRAS: c.35G>A, p.G12D     | N       | MSS |
| 77 | C20   | 59 | M | 85 | KRAS: c.38G>A, p.G13D     | N       | MSS |
| 78 | C20   | 58 | F | 30 | KRAS: c.35G>A, p.G12D     | N       | MSS |
| 79 | C21.0 | 42 | M | 80 | N                         | N       | MSS |
| 80 | C21.0 | 54 | F | 70 | KRAS: c.35G>A, p.G12D     | N       | MSS |
| 81 | C18.7 | 68 | M | 60 | KRAS: c.35G>A, p.G12D     | N       | MSS |
| 82 | C26.9 | 58 | F | 40 | KRAS: c.35G>A, p.G12D     | N       | MSS |
| 83 | C26.0 | 42 | M | 80 | N                         | N       | MSS |
